# Supplementary material for: The lantibiotic mersacidin is a strong inducer of the cell wall stress response of Staphylococcus aureus
Source: PubMed Central journal article supplement (PMC2592248; doi:10.1186/1471-2180-8-186), 2008-10-23
Supplement: 1471-2180-8-186-S1.pdf [file 1471-2180-8-186-S1.pdf]

TABLE A1. Genes with significantly increased expression of at least 2.5-fold in this study<sup>1</sup>

| N315 ORF                                                           | Gene        | Gene product                                                                           | Fold change <sup>2</sup> |                     |               |
|--------------------------------------------------------------------|-------------|----------------------------------------------------------------------------------------|--------------------------|---------------------|---------------|
|                                                                    |             |                                                                                        | SA137/93A (0.5xMIC)      | SA137/93G (0.5xMIC) | SG511 (1xMIC) |
| Adaption to atypical conditions                                    |             |                                                                                        |                          |                     |               |
| SA0483                                                             | <i>clpC</i> | endopeptidase                                                                          | 1.2                      | <b>2.7</b>          | <b>6.6</b>    |
| SA0659                                                             |             | hypothetical protein, similar to CsbB stress response protein                          | 2.1                      | <b>3.5</b>          | 3.0           |
| SA0723                                                             | <i>clpP</i> | ATP-dependent Clp protease proteolytic subunit homologue                               | 1.3                      | <b>3.0</b>          | <b>3.4</b>    |
| SA0755                                                             |             | hypothetical protein, similar to general stress protein 170                            | 1.7                      | <b>4.0</b>          | <b>2.8</b>    |
| SA0835                                                             | <i>clpB</i> | ClpB chaperone homologue                                                               | 1.5                      | 6.9                 | <b>16.4</b>   |
| SA1146                                                             | <i>bsaA</i> | glutathione peroxidase                                                                 | 2.1                      | <b>2.7</b>          | 2.7           |
| SA1410                                                             | <i>grpE</i> | GrpE protein                                                                           | 0.9                      | 3.1                 | <b>5.3</b>    |
| SA1549                                                             |             | hypothetical protein, similar to serine proteinase Do, heat-shock protein htrA         | <b>7.1</b>               | <b>4.6</b>          | <b>5.6</b>    |
| SA2175                                                             |             | hypothetical protein, similar to small heat shock protein                              | 2.4                      | <b>3.0</b>          | 3.1           |
| SA2336                                                             | <i>clpL</i> | ATP-dependent Clp proteinase chain clpL                                                | 0.9                      | <b>4.0</b>          | 1.3           |
| Cell division                                                      |             |                                                                                        |                          |                     |               |
| SA1023                                                             | <i>ftsL</i> | cell division protein                                                                  | <b>2.4</b>               | 1.6                 | <b>3.0</b>    |
| Cell wall related genes                                            |             |                                                                                        |                          |                     |               |
| SA0205                                                             |             | hypothetical protein, similar to lysostaphin precursor                                 | <b>6.0</b>               | <b>4.5</b>          | <b>13.6</b>   |
| SA0244                                                             |             | hypothetical protein, similar to teichoic acid biosynthesis protein F                  | 1.6                      | 1.4                 | <b>2.8</b>    |
| SA0265                                                             | <i>lytM</i> | peptidoglycan hydrolase                                                                | <b>4.0</b>               | <b>2.1</b>          | 1.7           |
| SA0638                                                             | <i>bacA</i> | bacitracin resistance protein (putative undecaprenol kinase) homologue                 | <b>3.0</b>               | <b>1.9</b>          | 1.8           |
| SA1103                                                             | <i>uppS</i> | undecaprenyl pyrophosphate synthetase                                                  | <b>2.5</b>               | <b>3.0</b>          | 2.0           |
| SA1266                                                             |             | hypothetical protein, similar to cell wall enzyme EbsB                                 | 3.4                      | 1.9                 | <b>3.7</b>    |
| SA1283                                                             | <i>pbp2</i> | penicillin binding protein 2                                                           | 3.4                      | 2.3                 | <b>3.5</b>    |
| SA1691                                                             | <i>sgtB</i> | hypothetical protein, similar to penicillin-binding protein 1A/1B                      | <b>13.1</b>              | <b>8.8</b>          | <b>9.7</b>    |
| SA1926                                                             | <i>murZ</i> | UDP-N-acetylglucosamine 1-carboxylvinyl transferase 2                                  | 3.2                      | <b>4.4</b>          | <b>6.1</b>    |
| SA2481                                                             |             | conserved hypothetical protein                                                         | <b>2.4</b>               | <b>3.5</b>          | <b>7.0</b>    |
| Detoxification                                                     |             |                                                                                        |                          |                     |               |
| SA0128                                                             | <i>sodM</i> | superoxide dismutase                                                                   | 1.0                      | X                   | 1.0           |
| SA0681                                                             |             | hypothetical protein, similar to multidrug resistance protein                          | 1.2                      | <b>3.1</b>          | 1.0           |
| SA1170                                                             | <i>kata</i> | Catalase                                                                               | 1.6                      | <b>2.7</b>          | 1.9           |
| SA1238                                                             |             | hypothetical protein, similar to tellurite resistance protein                          | <b>2.6</b>               | <b>3.2</b>          | <b>3.3</b>    |
| SA1382                                                             | <i>sodA</i> | superoxide dismutase SodA                                                              | 1.1                      | <b>3.0</b>          | 1.8           |
| DNA replication, modification, recombination and repair            |             |                                                                                        |                          |                     |               |
| SA1282                                                             | <i>recU</i> | recombination protein U homologue                                                      | <b>3.6</b>               | 2.5                 | <b>2.5</b>    |
| SA1313                                                             |             | probable ATP-dependent DNA helicase RecQ                                               | 2.0                      | <b>2.2</b>          | <b>2.7</b>    |
| SA1485                                                             | <i>radC</i> | truncated hypothetical protein, similar to DNA repair protein                          | 1.5                      | 1.4                 | <b>6.3</b>    |
| SA1711                                                             |             | hypothetical protein, similar to DNA-damage inducible protein P                        | 2.2                      | <b>1.6</b>          | <b>3.4</b>    |
| SA2335                                                             | <i>adaB</i> | probable methylated DNA-protein cysteine methyltransferase                             | 1.7                      | <b>2.8</b>          | 2.2           |
| Membrane bioenergetics (electron transport chain and ATP synthase) |             |                                                                                        |                          |                     |               |
| SA0211                                                             |             | hypothetical protein, similar to NADH-dependent dehydrogenase                          | 2.2                      | 1.3                 | <b>4.0</b>    |
| SA0411                                                             | <i>ndhF</i> | NADH dehydrogenase subunit 5                                                           | 1.6                      | 1.0                 | <b>2.9</b>    |
| SA0817                                                             |             | hypothetical protein, similar to NADH-dependent flavin oxidoreductase                  | 2.1                      | <b>3.4</b>          | <b>2.4</b>    |
| SA1221                                                             |             | thioredoxine reductase                                                                 | 1.2                      | <b>2.6</b>          | 1.2           |
| SA2324                                                             |             | hypothetical protein, similar to thioredoxin                                           | 1.3                      | <b>2.6</b>          | <b>3.0</b>    |
| Metabolism of amino acids                                          |             |                                                                                        |                          |                     |               |
| SA0011                                                             |             | hypothetical protein, similar to homoserine-o-acetyltransferase                        | <b>1.6</b>               | <b>2.0</b>          | <b>2.8</b>    |
| SA0430                                                             | <i>gltB</i> | glutamate synthase large subunit                                                       | <b>2.8</b>               | <b>2.0</b>          | 1.3           |
| SA0471                                                             | <i>cysK</i> | cysteine synthase (o-acetylserine sulfhydrylase) homologue                             | 1.6                      | <b>3.4</b>          | 1.8           |
| SA0512                                                             | <i>ilvE</i> | branched-chain amino acid aminotransferase homologue                                   | 2.1                      | <b>2.5</b>          | 2.1           |
| SA0829                                                             |             | hypothetical protein, similar to 5-oxo-1,2,5-tricarboxylic-3-penten acid decarboxylase | 2.1                      | <b>3.2</b>          | <b>3.1</b>    |
| SA0902                                                             |             | HisC homologue                                                                         | 2.2                      | 1.8                 | <b>4.2</b>    |
| SA0942                                                             | <i>pdfI</i> | formylmethionine deformylase homologue                                                 | 1.7                      | 1.6                 | <b>2.9</b>    |
| SA1164                                                             | <i>dhoM</i> | homoserine dehydrogenase                                                               | <b>2.5</b>               | <b>2.7</b>          | <b>6.2</b>    |
| SA1165                                                             | <i>thrC</i> | threonine synthase                                                                     | 1.6                      | 2.0                 | <b>3.9</b>    |

continued on following page

TABLE A1 - Continued

| N315<br>ORF                                          | Gene        | Gene product                                                                                                     | Fold change <sup>2</sup> |                        |                  |
|------------------------------------------------------|-------------|------------------------------------------------------------------------------------------------------------------|--------------------------|------------------------|------------------|
|                                                      |             |                                                                                                                  | SA137/93A<br>(0.5xMIC)   | SA137/93G<br>(0.5xMIC) | SG511<br>(1xMIC) |
| SA1166                                               | <i>thrB</i> | homoserine kinase homologue                                                                                      | 1.4                      | 1.7                    | <b>3.9</b>       |
| SA1216                                               |             | hypothetical protein, similar to oligoendopeptidase                                                              | 1.8                      | <b>1.7</b>             | <b>2.8</b>       |
| SA1226                                               | <i>asd</i>  | aspartate semialdehyde dehydrogenase                                                                             | 2.2                      | <b>3.8</b>             | 2.2              |
| SA1227                                               | <i>dapA</i> | dihydrodipicolinate synthase                                                                                     | <b>2.3</b>               | <b>3.0</b>             | 2.0              |
| SA1228                                               | <i>dapB</i> | dihydrodipicolinate reductase                                                                                    | <b>2.3</b>               | <b>2.6</b>             | 1.9              |
| SA1232                                               | <i>lysA</i> | diaminopimelate decarboxylase                                                                                    | <b>2.1</b>               | <b>2.4</b>             | <b>2.7</b>       |
| SA1531                                               | <i>ald</i>  | alanine dehydrogenase                                                                                            | 2.1                      | <b>1.5</b>             | <b>4.2</b>       |
| SA1545                                               | <i>serA</i> | D-3-phosphoglycerate dehydrogenase                                                                               | 2.1                      | <b>1.6</b>             | <b>2.8</b>       |
| SA1861                                               | <i>ilvC</i> | alpha-keto-beta-hydroxyacyl reductoisomerase                                                                     | <b>1.9</b>               | <b>2.5</b>             | 1.2              |
| SA2341                                               | <i>rocA</i> | 1-pyrroline-5-carboxylate dehydrogenase                                                                          | 1.2                      | 1.4                    | <b>3.1</b>       |
| Metabolism of carbohydrates                          |             |                                                                                                                  |                          |                        |                  |
| SA0528                                               |             | hypothetical protein, similar to hexulose-6-phosphate synthase                                                   | 1.5                      | <b>3.4</b>             | 3.3              |
| SA0658                                               |             | hypothetical protein, similar to plant-metabolite dehydrogenases                                                 | 1.5                      | <b>3.3</b>             | <b>2.6</b>       |
| SA0958                                               |             | myo-inositol-1(or 4)-monophosphatase homologue                                                                   | 1.8                      | <b>3.1</b>             | <b>3.1</b>       |
| SA1142                                               | <i>glpD</i> | aerobic glycerol-3-phosphate dehydrogenase                                                                       | 1.4                      | <b>2.0</b>             | <b>3.8</b>       |
| SA1566                                               |             | endo-1,4-beta-glucanase homologue                                                                                | <b>2.0</b>               | <b>2.9</b>             | 2.4              |
| SA1599                                               |             | hypothetical protein, similar to transaldolase                                                                   | 1.7                      | <b>2.7</b>             | <b>3.1</b>       |
| SA1736                                               | <i>aldH</i> | aldehyde dehydrogenase                                                                                           | 2.0                      | <b>2.3</b>             | <b>3.3</b>       |
| SA1924                                               |             | hypothetical protein, similar to aldehyde dehydrogenase                                                          | 1.3                      | <b>3.4</b>             | 2.4              |
| SA1925                                               |             | conserved hypothetical protein                                                                                   | <b>3.5</b>               | <b>3.8</b>             | <b>4.7</b>       |
| SA2104                                               |             | hypothetical protein, similar to suppressor protein SuhB                                                         | 1.4                      | <b>2.0</b>             | <b>2.9</b>       |
| SA2266                                               |             | hypothetical protein, similar to oxidoreductase                                                                  | <b>2.0</b>               | <b>3.4</b>             | 1.6              |
| SA2346                                               |             | hypothetical protein, similar to D-specific D-2-hydroxyacid dehydrogenase ddh homologue                          | 1.9                      | <b>2.2</b>             | <b>3.8</b>       |
| SA2490                                               |             | hypothetical protein, similar to N-hydroxyarylamine O-acetyltransferase                                          | <b>3.6</b>               | <b>6.0</b>             | <b>5.4</b>       |
| Metabolism of coenzymes and prosthetic groups        |             |                                                                                                                  |                          |                        |                  |
| SA0915                                               | <i>folD</i> | FolD bifunctional protein                                                                                        | 1.3                      | <b>2.7</b>             | 1.8              |
| SA2412                                               |             | hypothetical protein, similar to uroporphyrin-III C-methyltransferase                                            | 1.9                      | <b>2.3</b>             | <b>2.7</b>       |
| SA2438                                               |             | hypothetical protein, similar to N-carbamoylsarcosine amidohydrolase                                             | <b>2.3</b>               | <b>2.7</b>             | <b>3.7</b>       |
| Metabolism of lipids                                 |             |                                                                                                                  |                          |                        |                  |
| SA0534                                               | <i>vraB</i> | acetyl-CoA c-acetyltransferase                                                                                   | <b>18.5</b>              | <b>8.5</b>             | <b>12.9</b>      |
| SA0572                                               |             | hypothetical protein, similar to esterase/lipase                                                                 | 0.9                      | <b>3.3</b>             | 1.8              |
| SA1435                                               |             | hypothetical protein, similar to acetyl-CoA carboxylase (biotin carboxyl carrier subunit), <i>accB</i> homologue | 0.9                      | 1.3                    | <b>3.4</b>       |
| SA1542                                               |             | hypothetical protein, similar to glycerophosphoryl diester phosphodiesterase                                     | 2.3                      | <b>2.8</b>             | <b>4.6</b>       |
| SA2240                                               |             | hypothetical protein, similar to para-nitrobenzyl esterase chain A                                               | 1.8                      | <b>4.1</b>             | 2.2              |
| Metabolism of nucleotides and nucleic acids          |             |                                                                                                                  |                          |                        |                  |
| SA0864                                               |             | GTP pyrophosphokinase                                                                                            | 1.6                      | 1.8                    | <b>2.8</b>       |
| SA1172                                               |             | hypothetical protein, similar to GMP reductase                                                                   | 1.8                      | <b>3.0</b>             | 2.4              |
| SA1308                                               |             | 30S ribosomal protein S1                                                                                         | 2.0                      | <b>3.5</b>             | <b>3.2</b>       |
| SA2297                                               |             | hypothetical protein, similar to GTP-pyrophosphokinase                                                           | <b>9.1</b>               | <b>14.1</b>            | <b>10.3</b>      |
| Metabolism of phosphate                              |             |                                                                                                                  |                          |                        |                  |
| SA1237                                               |             | hypothetical protein, similar to 5-bromo-4-chloroindolyl phosphate hydrolysis protein XpaC                       | <b>2.5</b>               | <b>4.1</b>             | <b>6.0</b>       |
| SA2301                                               |             | hypothetical protein, similar to alkaline phosphatase                                                            | 2.7                      | <b>2.7</b>             | 3.3              |
| Pathogenic factors (toxins and colonization factors) |             |                                                                                                                  |                          |                        |                  |
| SA0382                                               | <i>set6</i> | exotoxin 6 [Pathogenicity island SaPI <sub>n</sub> 2]                                                            | 2.4                      | <b>2.7</b>             | <b>5.1</b>       |
| SA0610                                               |             | hypothetical protein, similar to lipase LipA                                                                     | 1.2                      | <b>0.7</b>             | <b>3.9</b>       |
| SA0909                                               | <i>fntA</i> | FntA, autolysis and methicillin resistant-related protein                                                        | <b>9.3</b>               | 3.8                    | <b>6.3</b>       |
| SA2006                                               |             | hypothetical protein, similar to MHC class II analogue                                                           | <b>3.4</b>               | <b>7.3</b>             | <b>4.4</b>       |
| SA2323                                               |             | conserved hypothetical protein                                                                                   | 1.9                      | <b>2.4</b>             | <b>2.9</b>       |
| Phage-related functions                              |             |                                                                                                                  |                          |                        |                  |
| SA1760                                               |             | holin homologue [Bacteriophage phiN315]                                                                          | <b>3.8</b>               | 3.2                    | <b>17.5</b>      |

continued on following page

TABLE A1 - Continued

| N315<br>ORF                                 | Gene         | Gene product                                                                                            | Fold change <sup>2</sup> |                        |                  |
|---------------------------------------------|--------------|---------------------------------------------------------------------------------------------------------|--------------------------|------------------------|------------------|
|                                             |              |                                                                                                         | SA137/93A<br>(0.5xMIC)   | SA137/93G<br>(0.5xMIC) | SG511<br>(1xMIC) |
| Protein modification, folding and secretion |              |                                                                                                         |                          |                        |                  |
| SA0825                                      | <i>spsA</i>  | type-I signal peptidase                                                                                 | <b>2.2</b>               | 1.4                    | <b>3.9</b>       |
| SA0826                                      | <i>spsB</i>  | type-1 signal peptidase 1B                                                                              | <b>2.4</b>               | 1.5                    | <b>2.9</b>       |
| SA1257                                      |              | peptide methionine sulfoxide reductase MsrA2                                                            | <b>6.0</b>               | <b>11.0</b>            | <b>17.1</b>      |
| SA1530                                      |              | Xaa-Pro dipeptidase homologue                                                                           | 1.8                      | <b>3.1</b>             | 2.2              |
| SA1409                                      | <i>dnaK</i>  | DnaK protein                                                                                            | 0.9                      | <b>2.1</b>             | <b>4.6</b>       |
| SA1659                                      | <i>prsA</i>  | peptidyl-prolyl cis/trans isomerase homologue                                                           | <b>10.8</b>              | <b>18.1</b>            | <b>33.3</b>      |
| SA1836                                      | <i>groEL</i> | GroEL protein                                                                                           | 1.2                      | <b>3.9</b>             | 4.5              |
| Protein transport and binding               |              |                                                                                                         |                          |                        |                  |
| SA0166                                      |              | hypothetical protein, similar to nitrate transporter                                                    | 2.0                      | <b>2.4</b>             | <b>2.6</b>       |
| SA0531                                      | <i>proP</i>  | proline/betaine transporter homologue                                                                   | 2.4                      | <b>2.7</b>             | 0.6              |
| SA0640                                      |              | hypothetical protein, similar to ABC transporter required for expression of cytochrome bd               | 1.6                      | 1.5                    | <b>2.6</b>       |
| SA0677                                      |              | hypothetical protein, similar to choline transport ATP-binding protein                                  | 1.2                      | 1.1                    | <b>2.8</b>       |
| SA0769                                      |              | ABC transporter ATP-binding protein homologue                                                           | 0.9                      | 1.4                    | <b>3.6</b>       |
| SA0845                                      | <i>oppB</i>  | oligopeptide transport system permease protein                                                          | 1.4                      | <b>3.6</b>             | <b>3.5</b>       |
| SA0846                                      |              | hypothetical protein, similar to oligopeptide transport system permease protein OppC                    | <b>1.8</b>               | <b>3.1</b>             | <b>3.4</b>       |
| SA0847                                      | <i>oppD</i>  | oligopeptide transport system ATP-binding protein OppD homologue                                        | 1.5                      | <b>3.0</b>             | <b>2.6</b>       |
| SA0848                                      | <i>oppF</i>  | oligopeptide transport system ATP-binding protein OppF homologue                                        | 2.3                      | <b>3.9</b>             | 2.1              |
| SA1255                                      |              | PTS system, glucose-specific enzyme IIA component                                                       | <b>4.7</b>               | <b>10.7</b>            | <b>13.1</b>      |
| SA1478                                      |              | hypothetical protein, similar to transporter PAB2175 from <i>Pyrococcus abyssi</i>                      | <b>3.8</b>               | <b>3.7</b>             | <b>4.9</b>       |
| SA1654                                      |              | hypothetical protein, similar to ABC transporter EcsB                                                   | 2.3                      | <b>2.0</b>             | <b>2.9</b>       |
| SA1655                                      |              | ABC transporter EcsA homologue                                                                          | 1.5                      | <b>2.4</b>             | <b>5.1</b>       |
| SA1848                                      | <i>nrgA</i>  | probabale ammonium transporter                                                                          | 1.4                      | 1.4                    | <b>4.1</b>       |
| SA1948                                      | <i>czrB</i>  | cation-efflux system membrane protein homologue                                                         | 0.9                      | <b>1.9</b>             | <b>2.7</b>       |
| SA2112                                      |              | hypothetical protein, similar to sodium-dependent transporter                                           | 1.9                      | 1.3                    | <b>2.9</b>       |
| SA2114                                      | <i>glvC</i>  | PTS system, arbutin-like IIBC component                                                                 | <b>3.7</b>               | <b>5.6</b>             | <b>4.7</b>       |
| SA2148                                      |              | hypothetical protein, similar to membrane protein                                                       | 1.4                      | 1.6                    | <b>4.1</b>       |
| SA2396                                      |              | hypothetical protein, similar to amino acid transporter                                                 | 1.9                      | <b>1.3</b>             | <b>3.0</b>       |
| SA2416                                      |              | hypothetical protein, similar to ABC transporter (ATP-binding protein)                                  | <b>2.3</b>               | <b>2.3</b>             | <b>2.7</b>       |
| SA2492                                      | <i>vraD</i>  | hypothetical protein, similar to ABC transporter                                                        | <b>59.4</b>              | <b>72.2</b>            | <b>52.7</b>      |
| SA2493                                      | <i>vraE</i>  | hypothetical protein, similar to ABC transporter (permease)                                             | <b>52.7</b>              | <b>39.6</b>            | <b>42.4</b>      |
| RNA synthesis - regulation                  |              |                                                                                                         |                          |                        |                  |
| SA0480                                      | <i>ctsR</i>  | transcription repressor of class III stress genes homologue                                             | 1.1                      | <b>4.2</b>             | <b>5.0</b>       |
| SA1195                                      | <i>msrR</i>  | peptide methionine sulfoxide reductase regulator MsrR                                                   | <b>4.2</b>               | <b>3.6</b>             | <b>5.5</b>       |
| SA1411                                      | <i>hrcA</i>  | Heat-inducible transcriptional repressor                                                                | 1.3                      | <b>3.3</b>             | <b>5.1</b>       |
| SA1700                                      | <i>vraR</i>  | two-component response regulator                                                                        | <b>13.3</b>              | <b>8.0</b>             | <b>17.3</b>      |
| SA1947                                      | <i>czrA</i>  | repressor protein                                                                                       | 1.2                      | <b>2.5</b>             | <b>3.5</b>       |
| SA2103                                      |              | hypothetical protein, similar to lyt divergon expression attenuator LytR                                | <b>6.4</b>               | <b>6.1</b>             | <b>8.0</b>       |
| SA2159                                      |              | hypothetical protein, similar to transcription repressor of sporulation, septation and degradation PaiA | 1.8                      | <b>2.1</b>             | <b>3.4</b>       |
| SA2296                                      |              | hypothetical protein, similar to transcriptional regulator, MerR family                                 | <b>8.1</b>               | <b>10.4</b>            | <b>5.5</b>       |
| SA2458                                      | <i>icaR</i>  | <i>ica</i> operon transcriptional regulator IcaR                                                        | 1.4                      | <b>2.6</b>             | 1.6              |
| Sensors (signal transduction)               |              |                                                                                                         |                          |                        |                  |
| SA1701                                      | <i>vraS</i>  | two-component sensor histidine kinase                                                                   | <b>11.7</b>              | <b>8.9</b>             | <b>17.0</b>      |
| Transformation competence                   |              |                                                                                                         |                          |                        |                  |
| SA0857                                      |              | hypothetical protein, similar to negative regulator of genetic competence MecA                          | 3.0                      | 3.4                    | <b>7.0</b>       |
| Hypothetical proteins                       |              |                                                                                                         |                          |                        |                  |
| SA0165                                      |              | hypothetical protein, similar to alpha-helical coiled-coil protein SrpF                                 | 1.8                      | <b>3.4</b>             | <b>3.5</b>       |
| SA0192                                      |              | hypothetical protein, similar to ABC transporter ATP-binding protein                                    | <b>23.6</b>              | <b>31.7</b>            | <b>26.6</b>      |
| SA0358                                      |              | conserved hypothetical protein                                                                          | <b>10.6</b>              | <b>15.4</b>            | <b>39.3</b>      |
| SA0359                                      |              | conserved hypothetical protein                                                                          | 1.9                      | <b>6.1</b>             | <b>4.3</b>       |

continued on following page

TABLE A1 - *Continued*

| N315<br>ORF | Gene        | Gene product                                                       | Fold change <sup>2</sup> |                        |                  |
|-------------|-------------|--------------------------------------------------------------------|--------------------------|------------------------|------------------|
|             |             |                                                                    | SA137/93A<br>(0.5xMIC)   | SA137/93G<br>(0.5xMIC) | SG511<br>(1xMIC) |
| SA0481      |             | conserved hypothetical protein                                     | 1.8                      | <b>5.3</b>             | <b>8.0</b>       |
| SA0482      |             | hypothetical protein, similar to creatine kinase                   | 1.2                      | <b>4.5</b>             | <b>5.8</b>       |
| SA0509      |             | conserved hypothetical protein                                     | 1.1                      | <b>2.8</b>             | 0.8              |
| SA0529      |             | conserved hypothetical protein                                     | 1.4                      | <b>3.0</b>             | <b>3.7</b>       |
| SA0530      |             | hypothetical protein, similar to indigoidine synthesis protein     | <b>2.5</b>               | <b>2.4</b>             | 1.3              |
| SA0535      | <i>vraC</i> | hypothetical protein                                               | <b>25.7</b>              | <b>11.3</b>            | <b>18.9</b>      |
| SA0536      |             | hypothetical protein                                               | <b>30.2</b>              | <b>17.1</b>            | <b>26.6</b>      |
| SA0591      |             | hypothetical protein                                               | <b>11.3</b>              | <b>8.9</b>             | <b>10.9</b>      |
| SA0608      |             | hypothetical protein                                               | <b>2.7</b>               | <b>3.8</b>             | <b>9.2</b>       |
| SA0611      |             | hypothetical protein                                               | 1.2                      | <b>0.8</b>             | <b>4.6</b>       |
| SA0612      |             | conserved hypothetical protein                                     | 2.0                      | <b>2.5</b>             | 2.4              |
| SA0637      |             | conserved hypothetical protein                                     | 2.5                      | <b>4.0</b>             | 1.5              |
| SA0647      |             | hypothetical protein                                               | 2.3                      | 1.2                    | <b>3.6</b>       |
| SA0648      |             | conserved hypothetical protein                                     | <b>2.4</b>               | 1.5                    | <b>3.6</b>       |
| SA0707      |             | conserved hypothetical protein                                     | <b>4.8</b>               | <b>9.7</b>             | 2.5              |
| SA0721      |             | conserved hypothetical protein                                     | 1.0                      | <b>3.1</b>             | 1.9              |
| SA0725      |             | conserved hypothetical protein                                     | 2.9                      | <b>2.9</b>             | 1.8              |
| SA0750      |             | conserved hypothetical protein                                     | 1.9                      | 1.7                    | <b>4.9</b>       |
| SA0770      |             | conserved hypothetical protein                                     | 0.8                      | 1.2                    | <b>3.8</b>       |
| SA0771      |             | conserved hypothetical protein                                     | 1.2                      | 1.4                    | <b>2.8</b>       |
| SA0772      |             | conserved hypothetical protein                                     | 2.4                      | <b>4.5</b>             | 0.8              |
| SA0782      |             | conserved hypothetical protein                                     | 2.1                      | 1.6                    | <b>2.9</b>       |
| SA0824      |             | conserved hypothetical protein                                     | <b>4.1</b>               | <b>2.4</b>             | <b>3.9</b>       |
| SA0833      |             | conserved hypothetical protein                                     | 1.8                      | <b>2.6</b>             | 1.8              |
| SA0856      |             | conserved hypothetical protein                                     | 2.0                      | <b>2.6</b>             | 2.1              |
| SA0903      |             | conserved hypothetical protein                                     | 3.2                      | 1.4                    | <b>5.3</b>       |
| SA0908      |             | conserved hypothetical protein                                     | 2.2                      | 1.5                    | <b>3.1</b>       |
| SA0914      |             | hypothetical protein, similar to chitinase B                       | <b>14.2</b>              | <b>3.9</b>             | <b>15.3</b>      |
| SA0931      |             | hypothetical protein                                               | <b>4.9</b>               | <b>3.2</b>             | <b>6.2</b>       |
| SA0943      |             | conserved hypothetical protein                                     | <b>3.2</b>               | <b>3.2</b>             | <b>4.5</b>       |
| SA0957      |             | conserved hypothetical protein                                     | 1.8                      | 2.2                    | <b>3.2</b>       |
| SA0962      |             | conserved hypothetical protein                                     | 1.8                      | 1.4                    | <b>2.8</b>       |
| SA1018      |             | conserved hypothetical protein                                     | 1.7                      | <b>2.2</b>             | <b>3.0</b>       |
| SA1019      |             | conserved hypothetical protein                                     | <b>3.9</b>               | <b>6.9</b>             | <b>6.5</b>       |
| SA1022      |             | conserved hypothetical protein                                     | 2.2                      | 2.1                    | <b>2.8</b>       |
| SA1050      |             | conserved hypothetical protein                                     | 2.0                      | <b>2.6</b>             | 1.1              |
| SA1173      |             | conserved hypothetical protein                                     | <b>2.7</b>               | <b>2.8</b>             | <b>3.7</b>       |
| SA1185      |             | conserved hypothetical protein                                     | 2.0                      | <b>1.9</b>             | <b>3.2</b>       |
| SA1186      |             | conserved hypothetical protein                                     | 1.9                      | 1.4                    | <b>3.4</b>       |
| SA1256      |             | conserved hypothetical protein                                     | <b>7.9</b>               | <b>16.1</b>            | <b>18.8</b>      |
| SA1280      |             | conserved hypothetical protein                                     | 1.7                      | <b>2.8</b>             | <b>2.8</b>       |
| SA1281      |             | conserved hypothetical protein                                     | <b>1.9</b>               | <b>3.0</b>             | <b>2.9</b>       |
| SA1293      |             | conserved hypothetical protein                                     | 1.7                      | <b>2.3</b>             | <b>3.5</b>       |
| SA1419      |             | conserved hypothetical protein                                     | 1.3                      | 1.4                    | <b>4.6</b>       |
| SA1436      |             | conserved hypothetical protein                                     | 0.7                      | 1.0                    | <b>3.4</b>       |
| SA1476      |             | hypothetical protein                                               | <b>11.5</b>              | <b>11.3</b>            | <b>15.9</b>      |
| SA1532      |             | conserved hypothetical protein                                     | 2.5                      | <b>9.1</b>             | <b>5.5</b>       |
| SA1543      |             | conserved hypothetical protein                                     | 2.8                      | <b>3.9</b>             | <b>6.0</b>       |
| SA1544      |             | hypothetical protein, similar to soluble hydrogenase 42 kD subunit | 1.8                      | <b>2.0</b>             | <b>4.9</b>       |
| SA1546      |             | hypothetical protein                                               | <b>2.3</b>               | <b>1.7</b>             | <b>3.2</b>       |
| SA1606      |             | plant metabolite dehydrogenase homologue                           | 1.9                      | <b>3.5</b>             | <b>2.6</b>       |
| SA1649      |             | conserved hypothetical protein                                     | 1.9                      | 1.1                    | <b>3.0</b>       |

*continued on following page*

TABLE A1 - *Continued*

| N315<br>ORF | Gene         | Gene product                                  | Fold change <sup>2</sup> |                        |                  |
|-------------|--------------|-----------------------------------------------|--------------------------|------------------------|------------------|
|             |              |                                               | SA137/93A<br>(0.5xMIC)   | SA137/93G<br>(0.5xMIC) | SG511<br>(1xMIC) |
| SA1680      |              | conserved hypothetical protein                | <b>2.3</b>               | <b>2.7</b>             | <b>3.0</b>       |
| SA1682      |              | conserved hypothetical protein                | 2.4                      | <b>2.9</b>             | 1.8              |
| SA1686      |              | conserved hypothetical protein                | 2.1                      | <b>2.1</b>             | <b>3.5</b>       |
| SA1690      |              | conserved hypothetical protein                | <b>2.0</b>               | <b>2.1</b>             | <b>4.0</b>       |
| SA1692      |              | conserved hypothetical protein                | 1.3                      | <b>3.1</b>             | 0.8              |
| SA1702      |              | conserved hypothetical protein                | <b>10.4</b>              | <b>9.4</b>             | <b>12.2</b>      |
| SA1703      |              | hypothetical protein                          | <b>31.6</b>              | <b>24.8</b>            | <b>45.4</b>      |
| SA1712      |              | conserved hypothetical protein                | <b>24.7</b>              | <b>21.0</b>            | <b>29.4</b>      |
| SA1743      |              | hypothetical protein                          | 2.7                      | <b>4.3</b>             | 2.6              |
| SA1942      |              | conserved hypothetical protein                | 1.7                      | <b>3.7</b>             | 2.5              |
| SA1990      |              | conserved hypothetical protein                | 1.9                      | <b>2.6</b>             | <b>3.9</b>       |
| SA2004      |              | conserved hypothetical protein                | 2.1                      | 2.2                    | <b>2.5</b>       |
| SA2049      |              | hypothetical protein                          | 4.3                      | <b>5.8</b>             | 6.5              |
| SA2113      |              | hypothetical protein                          | <b>14.9</b>              | <b>11.8</b>            | <b>11.4</b>      |
| SA2138      |              | conserved hypothetical protein                | 3.1                      | <b>4.2</b>             | 5.3              |
| SA2139      |              | hypothetical protein                          | 2.7                      | <b>2.8</b>             | 3.4              |
| SA2146      | <i>tcaA</i>  | TcaA protein                                  | <b>3.3</b>               | 1.6                    | <b>4.0</b>       |
| SA2158      |              | hypothetical protein, similar to TpgX protein | 2.1                      | <b>2.7</b>             | <b>2.3</b>       |
| SA2220      |              | conserved hypothetical protein                | <b>7.0</b>               | <b>12.2</b>            | <b>21.4</b>      |
| SA2221      |              | hypothetical protein                          | <b>25.6</b>              | <b>18.3</b>            | <b>42.7</b>      |
| SA2366      |              | conserved hypothetical protein                | 0.9                      | <b>2.7</b>             | 1.1              |
| SA2367      |              | conserved hypothetical protein                | 1.0                      | <b>3.3</b>             | 1.1              |
| SA2480      | <i>drp35</i> | drug responsive protein 35                    | 2.7                      | <b>3.4</b>             | <b>2.8</b>       |

<sup>1</sup> Significant changes of gene expression were determined by implementing SAM (significance analysis of microarrays; <http://www-stat.stanford.edu/~tibs/SAM/>).

<sup>2</sup> Fold change in transcript level indicated as mean of the “median of ratios” compared to control cells. Fold change in bold = classified as “significantly” regulated in this strain by SAM. “X” indicates the deletion of this ORF in the respective strain according to Reipert et al. (2003).
