# Supplementary material for: The lantibiotic mersacidin is a strong inducer of the cell wall stress response of Staphylococcus aureus
Source: PubMed Central journal article supplement (PMC2592248; doi:10.1186/1471-2180-8-186), 2008-10-23
Supplement: 1471-2180-8-186-S2.pdf [file 1471-2180-8-186-S2.pdf]

TABLE A2. Genes with significantly decreased expression of at least 2.5-fold in this study<sup>1</sup>

| N315<br>ORF                                                        | Gene         | Gene product                                                                                | Fold change <sup>2</sup> |                        |                  |
|--------------------------------------------------------------------|--------------|---------------------------------------------------------------------------------------------|--------------------------|------------------------|------------------|
|                                                                    |              |                                                                                             | SA137/93A<br>(0.5xMIC)   | SA137/93G<br>(0.5xMIC) | SG511<br>(1xMIC) |
| Adaption to atypical conditions                                    |              |                                                                                             |                          |                        |                  |
| SA0747                                                             | <i>cspC</i>  | cold-shock protein C                                                                        | 0.65                     | 0.84                   | <b>0.40</b>      |
| SA1984                                                             | <i>asp23</i> | alkaline shock protein 23, ASP23                                                            | 0.64                     | 2.24                   | <b>0.32</b>      |
| Cell division                                                      |              |                                                                                             |                          |                        |                  |
| SA0905                                                             | <i>atl</i>   | autolysin                                                                                   | <b>0.42</b>              | 0.49                   | <b>0.18</b>      |
| SA2499                                                             | <i>gidB</i>  | glucose inhibited division protein B                                                        | 0.57                     | <b>0.36</b>            | 0.56             |
| SA2500                                                             | <i>gidA</i>  | glucose inhibited division protein A                                                        | <b>0.55</b>              | <b>0.34</b>            | <b>0.51</b>      |
| Cell wall related genes                                            |              |                                                                                             |                          |                        |                  |
| SA0423                                                             |              | hypothetical protein, similar to autolysin                                                  | 0.58                     | <b>0.20</b>            | <b>0.20</b>      |
| SA0793                                                             | <i>dltA</i>  | D-alanine-D-alanyl carrier protein ligase                                                   | 0.63                     | <b>0.22</b>            | <b>0.24</b>      |
| SA2100                                                             |              | hypothetical protein, similar to autolysin E                                                | <b>0.46</b>              | <b>0.32</b>            | <b>0.30</b>      |
| SA2354                                                             |              | hypothetical protein, similar to acyltransferase                                            | 0.73                     | <b>0.37</b>            | <b>0.47</b>      |
| Membrane bioenergetics (electron transport chain and ATP synthase) |              |                                                                                             |                          |                        |                  |
| SA0910                                                             |              | hypothetical protein, similar to quinol oxidase polypeptide IV QoxD                         | <b>0.41</b>              | <b>0.20</b>            | <b>0.12</b>      |
| SA0911                                                             | <i>qoxC</i>  | Quinol oxidase polypeptide III QoxC                                                         | <b>0.34</b>              | <b>0.19</b>            | <b>0.14</b>      |
| SA0912                                                             | <i>qoxB</i>  | Quinol oxidase polypeptide I QoxB                                                           | <b>0.37</b>              | <b>0.21</b>            | <b>0.11</b>      |
| SA0913                                                             |              | hypothetical protein, similar to quinol oxidase polypeptide II QoxA                         | <b>0.40</b>              | <b>0.24</b>            | <b>0.19</b>      |
| SA0965                                                             | <i>ctaB</i>  | cytochrome <i>caa3</i> oxidase (assembly factor) homologue                                  | 0.57                     | <b>0.40</b>            | <b>0.35</b>      |
| SA1909                                                             | <i>atpF</i>  | ATP synthase B chain                                                                        | 0.72                     | <b>0.38</b>            | 0.49             |
| SA1910                                                             | <i>atpE</i>  | ATP synthase C chain                                                                        | 0.79                     | 0.43                   | <b>0.38</b>      |
| SA1911                                                             | <i>atpB</i>  | ATP synthase A chain                                                                        | 0.66                     | 0.43                   | <b>0.39</b>      |
| Metabolism of amino acids                                          |              |                                                                                             |                          |                        |                  |
| SA0180                                                             |              | hypothetical protein, similar to branched-chain amino acid transport system carrier protein | 0.54                     | <b>0.34</b>            | <b>0.33</b>      |
| SA2095                                                             |              | hypothetical protein, similar to D-octopine dehydrogenase                                   | <b>0.45</b>              | <b>0.49</b>            | <b>0.33</b>      |
| Metabolism of carbohydrates                                        |              |                                                                                             |                          |                        |                  |
| SA0562                                                             | <i>adh1</i>  | alcohol dehydrogenase I                                                                     | 2.23                     | 1.59                   | <b>0.30</b>      |
| SA0994                                                             | <i>sdhC</i>  | succinate dehydrogenase cytochrome b-558                                                    | <b>0.58</b>              | 0.62                   | <b>0.35</b>      |
| SA0996                                                             | <i>sdhB</i>  | succinate dehydrogenase iron-sulfur protein subunit                                         | 0.62                     | 0.58                   | <b>0.32</b>      |
| SA2008                                                             | <i>alsS</i>  | alpha-acetolactate synthase                                                                 | 0.73                     | <b>0.39</b>            | <b>0.29</b>      |
| SA2102                                                             |              | formate dehydrogenase homologue                                                             | 0.47                     | 0.86                   | <b>0.23</b>      |
| Metabolism of coenzymes and prosthetic groups                      |              |                                                                                             |                          |                        |                  |
| SA0665                                                             |              | coenzyme PQQ synthesis homologue                                                            | 0.73                     | <b>0.38</b>            | <b>0.54</b>      |
| SA0666                                                             |              | hypothetical protein 6-pyruvoyl tetrahydropterin synthase homologue                         | 0.61                     | 0.34                   | <b>0.38</b>      |
| SA1494                                                             | <i>hemC</i>  | porphobilinogen deaminase                                                                   | 0.65                     | <b>0.33</b>            | <b>0.42</b>      |
| SA1495                                                             | <i>hemX</i>  | HemA concentration negative effector HemX                                                   | 0.68                     | <b>0.37</b>            | <b>0.37</b>      |
| SA1537                                                             |              | hypothetical protein, similar to thiamine biosynthesis protein ThiI                         | 0.65                     | <b>0.35</b>            | <b>0.43</b>      |
| SA1538                                                             |              | hypothetical protein, similar to iron-sulfur cofactor synthesis protein NifZ                | <b>0.52</b>              | <b>0.31</b>            | <b>0.48</b>      |
| SA1919                                                             |              | hypothetical protein, similar to protoporphyrinogen oxidase (HemK)                          | <b>0.44</b>              | <b>0.39</b>            | <b>0.39</b>      |
| Metabolism of lipids                                               |              |                                                                                             |                          |                        |                  |
| SA0820                                                             | <i>glpQ</i>  | glycerophosphoryl diester phosphodiesterase                                                 | 1.11                     | <b>0.47</b>            | <b>0.29</b>      |
| Metabolism of nucleotides and nucleic acids                        |              |                                                                                             |                          |                        |                  |
| SA0373                                                             | <i>xprT</i>  | xanthine phosphoribosyltransferase                                                          | <b>0.41</b>              | <b>0.13</b>            | <b>0.43</b>      |
| SA0511                                                             |              | hypothetical protein, similar to UDP-glucose 4-epimerase related protein                    | 0.57                     | <b>0.52</b>            | <b>0.33</b>      |
| SA0927                                                             |              | conserved hypothetical protein                                                              | 0.75                     | 0.69                   | <b>0.22</b>      |
| SA1043                                                             | <i>pyrB</i>  | aspartate transcarbamoylase chain A                                                         | 0.92                     | 2.22                   | <b>0.05</b>      |
| SA1044                                                             | <i>pyrC</i>  | dihydroorotase                                                                              | 0.98                     | <b>2.06</b>            | <b>0.03</b>      |
| SA1045                                                             | <i>pyrAA</i> | carbamoyl-phosphate synthase small chain                                                    | 1.05                     | 1.58                   | <b>0.07</b>      |
| SA1046                                                             | <i>pyrAB</i> | carbamoyl-phosphate synthase large chain                                                    | 0.87                     | 1.58                   | <b>0.08</b>      |
| SA1047                                                             | <i>pyrF</i>  | orotidine-5-phosphate decarboxylase                                                         | 0.81                     | 1.65                   | <b>0.05</b>      |
| SA1048                                                             | <i>pyrE</i>  | orotate phosphoribosyltransferase                                                           | 0.87                     | 1.43                   | <b>0.07</b>      |
| SA1461                                                             | <i>apt</i>   | adenine phosphoribosyl transferase                                                          | 0.71                     | 0.62                   | <b>0.39</b>      |
| SA1921                                                             | <i>tdk</i>   | thymidine kinase                                                                            | 0.61                     | <b>0.50</b>            | <b>0.39</b>      |

continued on following page

TABLE A2 - Continued

| N315<br>ORF                                                           | Gene         | Gene product                                                       | Fold change <sup>2</sup> |                        |                  |
|-----------------------------------------------------------------------|--------------|--------------------------------------------------------------------|--------------------------|------------------------|------------------|
|                                                                       |              |                                                                    | SA137/93A<br>(0.5xMIC)   | SA137/93G<br>(0.5xMIC) | SG511<br>(1xMIC) |
| SA2027                                                                | <i>adk</i>   | adenylate kinase                                                   | 0.53                     | 0.31                   | <b>0.33</b>      |
| Pathogenic factors (toxins and colonization factors)                  |              |                                                                    |                          |                        |                  |
| SA0270                                                                |              | hypothetical protein, similar to secretory antigen precursor SsaA  | 0.67                     | <b>0.51</b>            | <b>0.13</b>      |
| SA0276                                                                |              | conserved hypothetical protein, similar to diarrheal toxin         | 0.84                     | <b>0.34</b>            | 0.99             |
| SA0519                                                                | <i>sdrC</i>  | Ser-Asp rich fibrinogen-binding, bone sialoprotein-binding protein | 0.53                     | <b>0.27</b>            | <b>0.08</b>      |
| SA0521                                                                | <i>sdrE</i>  | Ser-Asp rich fibrinogen-binding, bone sialoprotein-binding protein | 1.74                     | 1.40                   | <b>0.32</b>      |
| SA0587                                                                |              | lipoprotein, streptococcal adhesin PsaA homologue                  | 0.76                     | 1.21                   | <b>0.25</b>      |
| SA0742                                                                | <i>clfA</i>  | fibrinogen-binding protein A, clumping factor                      | 0.80                     | 1.21                   | <b>0.22</b>      |
| SA0746                                                                |              | staphylococcal nuclease                                            | 0.99                     | <b>0.26</b>            | 0.65             |
| SA1645                                                                | <i>yentI</i> | enterotoxin YentI [Pathogenicity island SaPI <sub>n</sub> 3]       | 1.28                     | 1.30                   | <b>0.39</b>      |
| SA1647                                                                | <i>sem</i>   | enterotoxin SEM [Pathogenicity island SaPI <sub>n</sub> 3]         | 1.47                     | 1.31                   | <b>0.36</b>      |
| SA2093                                                                | <i>ssaA</i>  | secretory antigen precursor SsaA homologue                         | 0.57                     | <b>0.23</b>            | <b>0.34</b>      |
| SA2206                                                                | <i>sbi</i>   | IgG-binding protein SBI                                            | 0.87                     | <b>0.33</b>            | 1.30             |
| SA2290                                                                | <i>fnbB</i>  | fibronectin-binding protein homologue                              | 0.49                     | <b>0.27</b>            | 1.29             |
| SA2291                                                                | <i>fnb</i>   | fibronectin-binding protein homologue                              | 0.51                     | <b>0.32</b>            | 1.15             |
| SA2353                                                                |              | hypothetical protein, similar to secretory antigen precursor SsaA  | 0.69                     | <b>0.38</b>            | 0.78             |
| SA2356                                                                | <i>isaA</i>  | immunodominant antigen A                                           | 0.73                     | 0.51                   | <b>0.36</b>      |
| SA2423                                                                | <i>clfB</i>  | clumping factor B                                                  | 0.81                     | 0.90                   | <b>0.17</b>      |
| Phage-related functions                                               |              |                                                                    |                          |                        |                  |
| SA1798                                                                |              | hypothetical protein [Bacteriophage phiN315]                       | 0.57                     | <b>0.38</b>            | <b>0.36</b>      |
| Protein modification, folding and secretion                           |              |                                                                    |                          |                        |                  |
| SA2028                                                                | <i>secY</i>  | preprotein translocase SecY subunit                                | 0.58                     | 0.32                   | <b>0.34</b>      |
| SA2446                                                                |              | hypothetical protein, similar to preprotein translocase SecY       | 0.87                     | <b>0.39</b>            | 1.08             |
| Protein synthesis - initiation and termination                        |              |                                                                    |                          |                        |                  |
| SA1504                                                                | <i>infC</i>  | translation initiation factor IF-3 InfC                            | 0.72                     | <b>0.40</b>            | <b>0.53</b>      |
| SA1920                                                                | <i>prfA</i>  | peptide chain release factor 1                                     | 0.47                     | <b>0.37</b>            | <b>0.41</b>      |
| Protein synthesis - ribosomal proteins and aminoacyl-tRNA synthetases |              |                                                                    |                          |                        |                  |
| SA0354                                                                | <i>rpsR</i>  | 30S ribosomal protein S18                                          | 0.73                     | <b>0.48</b>            | <b>0.29</b>      |
| SA0486                                                                | <i>gltX</i>  | glutamyl-tRNA synthetase                                           | 0.57                     | <b>0.35</b>            | 0.53             |
| SA0497                                                                | <i>rplJ</i>  | 50S ribosomal protein L10 (BL5)                                    | 0.48                     | 0.28                   | <b>0.32</b>      |
| SA0498                                                                | <i>rplL</i>  | 50S ribosomal protein L7/L12                                       | 0.51                     | 0.37                   | <b>0.30</b>      |
| SA0503                                                                | <i>rpsL</i>  | 30S ribosomal protein S12                                          | 0.48                     | <b>0.28</b>            | <b>0.40</b>      |
| SA0504                                                                | <i>rpsG</i>  | 30S ribosomal protein S7                                           | <b>0.42</b>              | <b>0.28</b>            | <b>0.44</b>      |
| SA1081                                                                | <i>rpsP</i>  | 30S ribosomal protein S16                                          | 0.55                     | <b>0.52</b>            | <b>0.31</b>      |
| SA1471                                                                | <i>rpmA</i>  | 50S ribosomal protein L27                                          | 0.46                     | <b>0.37</b>            | 0.59             |
| SA1922                                                                | <i>rpmE</i>  | 50S ribosomal protein L31                                          | 0.61                     | <b>0.48</b>            | <b>0.38</b>      |
| SA2022                                                                | <i>rplQ</i>  | 50S ribosomal protein L17                                          | 0.45                     | <b>0.22</b>            | <b>0.26</b>      |
| SA2024                                                                | <i>rpsK</i>  | 30S ribosomal protein S11                                          | 0.44                     | 0.31                   | <b>0.30</b>      |
| SA2029                                                                | <i>rplO</i>  | 50S ribosomal protein L15                                          | 0.50                     | 0.29                   | <b>0.31</b>      |
| SA2030                                                                | <i>rpmD</i>  | 50S ribosomal protein L30                                          | 0.53                     | 0.25                   | <b>0.32</b>      |
| SA2031                                                                | <i>rpsE</i>  | 30S ribosomal protein S5                                           | 0.66                     | <b>0.29</b>            | <b>0.39</b>      |
| SA2032                                                                | <i>rplR</i>  | 50S ribosomal protein L18                                          | 0.49                     | 0.25                   | <b>0.29</b>      |
| SA2033                                                                | <i>rplF</i>  | 50S ribosomal protein L6                                           | 0.43                     | 0.26                   | <b>0.28</b>      |
| SA2034                                                                | <i>rpsH</i>  | 30S ribosomal protein S8                                           | 0.50                     | 0.26                   | <b>0.35</b>      |
| SA2035                                                                | <i>rplE</i>  | 50S ribosomal protein L5                                           | 0.47                     | 0.24                   | <b>0.26</b>      |
| SA2036                                                                | <i>rplX</i>  | 50S ribosomal protein L24                                          | 0.41                     | 0.25                   | <b>0.26</b>      |
| SA2037                                                                | <i>rplN</i>  | 50S ribosomal protein L14                                          | 0.43                     | 0.22                   | <b>0.28</b>      |
| SA2038                                                                | <i>rpsQ</i>  | 30S ribosomal protein S17                                          | 0.42                     | <b>0.24</b>            | <b>0.25</b>      |
| SA2039                                                                | <i>rpmC</i>  | 50S ribosomal protein L29                                          | 0.41                     | <b>0.22</b>            | <b>0.25</b>      |
| SA2040                                                                | <i>rplP</i>  | 50S ribosomal protein L16                                          | 0.53                     | 0.24                   | <b>0.31</b>      |
| SA2041                                                                | <i>rpsC</i>  | 30S ribosomal protein S3                                           | 0.43                     | 0.25                   | <b>0.24</b>      |
| SA2042                                                                | <i>rplV</i>  | 50S ribosomal protein L22                                          | 0.58                     | 0.31                   | <b>0.31</b>      |
| SA2043                                                                | <i>rpsS</i>  | 30S ribosomal protein S19                                          | 0.54                     | 0.28                   | <b>0.29</b>      |

continued on following page

TABLE A2 - Continued

| N315<br>ORF                                             | Gene        | Gene product                                                                     | Fold change <sup>2</sup> |                        |                  |
|---------------------------------------------------------|-------------|----------------------------------------------------------------------------------|--------------------------|------------------------|------------------|
|                                                         |             |                                                                                  | SA137/93A<br>(0.5xMIC)   | SA137/93G<br>(0.5xMIC) | SG511<br>(1xMIC) |
| SA2045                                                  | <i>rplW</i> | 50S ribosomal protein L23                                                        | 0.46                     | 0.26                   | <b>0.36</b>      |
| SA2046                                                  | <i>rplD</i> | 50S ribosomal protein L4                                                         | 0.46                     | 0.27                   | <b>0.36</b>      |
| SA2048                                                  | <i>rpsJ</i> | 30S ribosomal protein S10                                                        | 0.43                     | <b>0.31</b>            | <b>0.48</b>      |
| SAS052                                                  | <i>rpsD</i> | 30S ribosomal protein S4                                                         | 0.71                     | <b>0.47</b>            | <b>0.38</b>      |
| SAS079                                                  | <i>rpsN</i> | 30S ribosomal protein S14                                                        | 0.51                     | 0.27                   | <b>0.27</b>      |
| Protein transport and binding                           |             |                                                                                  |                          |                        |                  |
| SA0183                                                  | <i>glcA</i> | PTS enzyme II, glucose-specific, factor IIA homologue                            | <b>0.34</b>              | <b>0.21</b>            | <b>0.09</b>      |
| SA0272                                                  |             | hypothetical protein, similar to transmembrane protein Tmp7                      | <b>0.47</b>              | <b>0.33</b>            | 0.97             |
| SA0295                                                  |             | hypothetical protein, similar to outer membrane protein precursor                | 0.65                     | <b>0.31</b>            | <b>0.26</b>      |
| SA0374                                                  | <i>pbuX</i> | xanthine permease                                                                | 0.52                     | <b>0.11</b>            | <b>0.50</b>      |
| SA0479                                                  | <i>nupC</i> | pyrimidine nucleoside transport protein                                          | <b>0.33</b>              | <b>0.24</b>            | <b>0.10</b>      |
| SA0616                                                  | <i>vraF</i> | ABC transporter ATP-binding protein                                              | 0.64                     | <b>0.36</b>            | 1.46             |
| SA0617                                                  | <i>vraG</i> | ABC transporter permease                                                         | 0.92                     | <b>0.38</b>            | 1.49             |
| SA0688                                                  |             | hypothetical protein, similar to ferrichrome ABC transporter permease            | 1.26                     | 0.75                   | <b>0.32</b>      |
| SA0689                                                  |             | hypothetical protein, similar to ferrichrome ABC transporter permease            | 0.88                     | <b>0.69</b>            | <b>0.26</b>      |
| SA0690                                                  |             | hypothetical protein, similar to ferrichrome ABC transporter ATP-binding protein | <b>0.44</b>              | <b>0.52</b>            | <b>0.37</b>      |
| SA0794                                                  | <i>dltB</i> | DltB membrane protein                                                            | 0.79                     | <b>0.26</b>            | <b>0.31</b>      |
| SA0796                                                  | <i>dltD</i> | poly D-alanine transfer protein                                                  | 0.75                     | 0.24                   | <b>0.30</b>      |
| SA0928                                                  |             | hypothetical protein, similar to cation ABC transporter                          | 0.90                     | 0.90                   | <b>0.23</b>      |
| SA0950                                                  | <i>potA</i> | spermidine/putrescine ABC transporter, ATP-binding protein homologue             | 0.62                     | <b>0.31</b>            | <b>0.30</b>      |
| SA0951                                                  | <i>potB</i> |                                                                                  | 0.58                     | <b>0.44</b>            | <b>0.28</b>      |
| SA0952                                                  | <i>potC</i> | spermidine/putrescine ABC transporter homologue                                  | 0.51                     | <b>0.23</b>            | <b>0.28</b>      |
| SA1042                                                  | <i>pyrP</i> | uracil permease                                                                  | 1.16                     | <b>2.02</b>            | <b>0.07</b>      |
| SA1224                                                  |             | ABC transporter (ATP-binding protein) homologue                                  | <b>0.48</b>              | <b>0.35</b>            | <b>0.36</b>      |
| SA1979                                                  |             | hypothetical protein, similar to ferrichrome ABC transporter (binding protein)   | 0.46                     | <b>0.55</b>            | <b>0.32</b>      |
| SA2094                                                  |             | hypothetical protein, similar to Na <sup>+</sup> /H <sup>+</sup> antiporter      | <b>0.46</b>              | <b>0.33</b>            | 0.81             |
| SA2117                                                  |             | hypothetical protein, similar to Na <sup>+</sup> /H <sup>+</sup> antiporter      | 0.82                     | <b>0.36</b>            | 0.76             |
| SA2132                                                  |             | hypothetical protein, similar to ABC transporter (ATP-binding protein)           | <b>0.34</b>              | <b>0.22</b>            | <b>0.21</b>      |
| SA2135                                                  |             | hypothetical protein, similar to sodium/glutamate symporter                      | 0.71                     | 0.65                   | <b>0.23</b>      |
| SA2142                                                  |             | hypothetical protein, similar to multidrug resistance protein                    | <b>0.40</b>              | <b>0.42</b>            | <b>0.23</b>      |
| SA2191                                                  |             | hypothetical protein, similar to NirC                                            | 0.54                     | <b>0.31</b>            | 0.67             |
| SA2300                                                  |             | hypothetical protein, similar to glucarate transporter                           | 0.81                     | 0.83                   | <b>0.22</b>      |
| SA2302                                                  |             | hypothetical protein, similar to ABC transporter                                 | 1.12                     | 0.83                   | <b>0.27</b>      |
| SA2303                                                  |             | hypothetical protein, similar to membrane spanning protein                       | 1.15                     | 0.65                   | <b>0.18</b>      |
| SA2326                                                  | <i>ptsG</i> | PTS system, glucose-specific IIABC component                                     | 0.64                     | <b>0.42</b>            | <b>0.32</b>      |
| RNA synthesis - regulation, elongation and modification |             |                                                                                  |                          |                        |                  |
| SA0501                                                  | <i>rpoC</i> | RNA polymerase beta-prime chain                                                  | 0.81                     | <b>0.39</b>            | 0.54             |
| SA1041                                                  | <i>pyrR</i> | pyrimidine operon repressor chain A                                              | 0.72                     | 1.28                   | <b>0.13</b>      |
| SA1082                                                  | <i>rimM</i> | probable 16S rRNA processing protein                                             | <b>0.40</b>              | <b>0.31</b>            | <b>0.32</b>      |
| SA1083                                                  | <i>trmD</i> | tRNA-(guanine-N1)-methyltransferase                                              | <b>0.44</b>              | <b>0.32</b>            | <b>0.38</b>      |
| SA1583                                                  | <i>rot</i>  | repressor of toxins Rot                                                          | 0.55                     | 0.64                   | <b>0.23</b>      |
| SA1844                                                  | <i>agrA</i> | accessory gene regulator A                                                       | <b>0.33</b>              | <b>0.22</b>            | <b>0.53</b>      |
| SA2023                                                  | <i>rpoA</i> | DNA-directed RNA polymerase alpha chain                                          | 0.43                     | <b>0.23</b>            | <b>0.25</b>      |
| SA2089                                                  | <i>sarR</i> | staphylococcal accessory regulator A homologue                                   | 0.53                     | <b>0.36</b>            | <b>0.31</b>      |
| Sensors (signal transduction)                           |             |                                                                                  |                          |                        |                  |
| SA1843                                                  | <i>agrC</i> | accessory gene regulator C                                                       | <b>0.51</b>              | <b>0.27</b>            | 0.70             |
| Hypothetical proteins                                   |             |                                                                                  |                          |                        |                  |
| SA0121                                                  |             | hypothetical protein                                                             | 0.64                     | X                      | <b>0.34</b>      |
| SA0213                                                  |             | conserved hypothetical protein                                                   | <b>0.33</b>              | <b>0.39</b>            | <b>0.37</b>      |
| SA0231                                                  |             | hypothetical protein, similar to flavohemoprotein                                | 0.90                     | 0.90                   | <b>0.36</b>      |
| SA0262                                                  |             | hypothetical protein                                                             | 0.51                     | <b>0.47</b>            | <b>0.20</b>      |

continued on following page

TABLE A2 - *Continued*

| N315<br>ORF | Gene | Gene product                   | Fold change <sup>2</sup> |                        |                  |
|-------------|------|--------------------------------|--------------------------|------------------------|------------------|
|             |      |                                | SA137/93A<br>(0.5xMIC)   | SA137/93G<br>(0.5xMIC) | SG511<br>(1xMIC) |
| SA0266      |      | conserved hypothetical protein | 1.47                     | 1.03                   | <b>0.34</b>      |
| SA0267      |      | hypothetical protein           | 1.13                     | 0.78                   | <b>0.35</b>      |
| SA0268      |      | hypothetical protein           | 1.05                     | 0.90                   | <b>0.39</b>      |
| SA0269      |      | hypothetical protein           | 1.10                     | 1.18                   | <b>0.03</b>      |
| SA0291      |      | hypothetical protein           | <b>0.31</b>              | <b>0.36</b>            | <b>0.11</b>      |
| SA0292      |      | hypothetical protein           | <b>0.26</b>              | <b>0.23</b>            | <b>0.07</b>      |
| SA0406      |      | hypothetical protein           | 0.70                     | 0.98                   | <b>0.35</b>      |
| SA0499      |      | conserved hypothetical protein | 0.54                     | <b>0.28</b>            | <b>0.53</b>      |
| SA0555      |      | conserved hypothetical protein | 0.74                     | <b>0.53</b>            | <b>0.27</b>      |
| SA0588      |      | conserved hypothetical protein | 0.63                     | 1.26                   | <b>0.30</b>      |
| SA0667      |      | conserved hypothetical protein | 0.79                     | <b>0.21</b>            | <b>0.40</b>      |
| SA0739      |      | conserved hypothetical protein | <b>0.27</b>              | <b>0.29</b>            | <b>0.04</b>      |
| SA0890      |      | conserved hypothetical protein | 0.42                     | <b>0.20</b>            | 0.58             |
| SA0929      |      | conserved hypothetical protein | 0.73                     | 0.94                   | <b>0.34</b>      |
| SA0949      |      | conserved hypothetical protein | 0.73                     | <b>0.31</b>            | 0.52             |
| SA1002      |      | hypothetical protein           | 1.01                     | <b>0.55</b>            | <b>0.20</b>      |
| SA1049      |      | hypothetical protein           | 1.11                     | 1.44                   | <b>0.13</b>      |
| SA1056      |      | hypothetical protein           | 0.62                     | <b>0.53</b>            | <b>0.35</b>      |
| SA1265      |      | conserved hypothetical protein | <b>0.49</b>              | <b>0.19</b>            | <b>0.36</b>      |
| SA1275      |      | conserved hypothetical protein | 0.64                     | <b>0.57</b>            | <b>0.39</b>      |
| SA1536      |      | conserved hypothetical protein | <b>0.55</b>              | <b>0.35</b>            | 0.53             |
| SA1693      |      | conserved hypothetical protein | 0.73                     | <b>0.60</b>            | <b>0.35</b>      |
| SA1840      |      | conserved hypothetical protein | 0.62                     | <b>0.39</b>            | 0.57             |
| SA1912      |      | hypothetical protein           | 0.55                     | 0.45                   | <b>0.33</b>      |
| SA1985      |      | hypothetical protein           | 0.53                     | 1.74                   | <b>0.20</b>      |
| SA1986      |      | hypothetical protein           | 0.49                     | 1.56                   | <b>0.19</b>      |
| SA2050      |      | conserved hypothetical protein | 0.59                     | <b>0.29</b>            | <b>0.44</b>      |
| SA2133      |      | conserved hypothetical protein | 0.51                     | <b>0.31</b>            | <b>0.21</b>      |
| SA2143      |      | conserved hypothetical protein | <b>0.46</b>              | <b>0.53</b>            | <b>0.30</b>      |
| SA2328      |      | conserved hypothetical protein | 0.90                     | 1.38                   | <b>0.37</b>      |
| SA2329      |      | conserved hypothetical protein | <b>0.26</b>              | <b>0.22</b>            | <b>0.21</b>      |
| SA2355      |      | conserved hypothetical protein | 0.80                     | <b>0.39</b>            | 0.72             |
| SA2371      |      | conserved hypothetical protein | 0.69                     | 0.80                   | <b>0.29</b>      |
| SA2372      |      | hypothetical protein           | 0.58                     | 0.74                   | <b>0.34</b>      |
| SA2443      |      | hypothetical protein           | 0.84                     | <b>0.37</b>            | 1.00             |

<sup>1</sup> Significant changes of gene expression were determined by implementing SAM (significance analysis of microarrays; <http://www-stat.stanford.edu/~tibs/SAM/>).

<sup>2</sup> Fold change in transcript level indicated as mean of the “median of ratios” compared to control cells. Fold change in bold = classified as “significantly” regulated in this strain by SAM. “X” indicates the deletion of this ORF in the respective strain according to Reipert et al. (2003).
